# Supplementary material for: Piezochromic effects and low-pressure superconductivity discovered in inorganic halide perovskite RbPbI3
Source: Royal Society of Chemistry journal article supplement (doi:10.1039/d3tc03535b), 2023-11-28
Supplement: d3tc03535b1.pdf [file d3tc03535b1.pdf]

## Supporting Information

### **Piezochromic Effect and Low-pressure Superconductivity Discovered in Inorganic Halide Perovskite RbPbI<sub>3</sub>**

Siyuan Zhou,<sup>ab,†</sup> Hao Tian,<sup>c,‡</sup> Xiaoyu Kuang,<sup>b</sup> Siyu Jin,<sup>b</sup> Miao Yu,<sup>b</sup> Jichao Chen,<sup>b</sup> and  
Aijie Mao\*<sup>ab</sup>

<sup>a</sup> College of Physics, Sichuan University, Chengdu 610064, China

<sup>b</sup> Institute of Atomic and Molecular Physics, Sichuan University, Chengdu 610065, China

<sup>c</sup> School of Physics and Electronic Engineering, Zhengzhou Normal University, Zhengzhou  
450044, China

Table S1. RbPbI<sub>3</sub> atomic positions of four stable structures at 0-100 GPa.

|                                   |              | Coordinates  |                                  |                                      |                                  |
|-----------------------------------|--------------|--------------|----------------------------------|--------------------------------------|----------------------------------|
|                                   | <i>Atoms</i> | <i>Wyck.</i> | <i>x</i>                         | <i>y</i>                             | <i>z</i>                         |
| ppPv- <i>Pnma</i><br>(0 GPa)      |              |              | a=10.2718 Å<br>$\alpha=90^\circ$ | b=4.7359 Å<br>$\beta=90^\circ$       | c=17.2976 Å<br>$\gamma=90^\circ$ |
|                                   | Rb           | 4c           | 0.58055                          | 0.25000                              | 0.82556                          |
|                                   | Pb           | 4c           | 0.33525                          | 0.25000                              | 0.44062                          |
|                                   | I            | 4c           | 0.34435                          | 0.25000                              | 0.00686                          |
|                                   | I            | 4c           | 0.97049                          | 0.25000                              | 0.88496                          |
|                                   | I            | 4c           | 0.69645                          | 0.25000                              | 0.21768                          |
| ppPv- <i>Pnma</i> (I)<br>(5 GPa)  |              |              | a=7.9752 Å<br>$\alpha=90^\circ$  | b=5.073 Å<br>$\beta=90^\circ$        | c=16.4626 Å<br>$\gamma=90^\circ$ |
|                                   | Rb           | 4c           | 1.07352                          | 0.25000                              | 0.8208                           |
|                                   | Pb           | 4c           | 0.78359                          | 0.25000                              | 0.4439                           |
|                                   | I            | 4c           | 0.85763                          | 0.25000                              | 0.04177                          |
|                                   | I            | 4c           | 0.50008                          | 0.25000                              | 0.89006                          |
|                                   | I            | 4c           | 1.18899                          | 0.25000                              | 0.23603                          |
| ppPv- <i>Pnma</i> (V)<br>(20 GPa) |              |              | a= 6.5322 Å<br>$\alpha=90^\circ$ | b=5.1027 Å<br>$\beta=90^\circ$       | c=15.4785 Å<br>$\gamma=90^\circ$ |
|                                   | Rb           | 4c           | 0.51283                          | 0.25000                              | 0.8397                           |
|                                   | Pb           | 4c           | 0.32683                          | 0.25000                              | 0.4437                           |
|                                   | I            | 4c           | 0.33923                          | 0.25000                              | 0.04398                          |
|                                   | I            | 4c           | 0.00161                          | 0.25000                              | 0.86653                          |
|                                   | I            | 4c           | 0.71879                          | 0.25000                              | 0.24444                          |
| <i>Pm</i><br>(80 GPa)             |              |              | a=7.6996 Å<br>$\alpha=90^\circ$  | b=4.8445 Å<br>$\beta=109.2692^\circ$ | c=5.2376 Å<br>$\gamma=90^\circ$  |
|                                   | Rb           | 1b           | 0.65882                          | 0.50000                              | 0.06823                          |
|                                   | Pb           | 1b           | 0.44922                          | 0.50000                              | 0.45194                          |
|                                   | I            | 1b           | 0.85000                          | 0.50000                              | 0.66872                          |
|                                   | I            | 1b           | 0.26299                          | 0.50000                              | 0.85760                          |
|                                   | I            | 1b           | 0.05094                          | 0.50000                              | 0.26532                          |
|                                   | Rb           | 1a           | 0.06782                          | -0.00000                             | 0.59025                          |
|                                   | Pb           | 1a           | 0.86724                          | -0.00000                             | 0.98253                          |
|                                   | I            | 1a           | 0.47534                          | -0.00000                             | 0.78269                          |
|                                   | I            | 1a           | 0.25636                          | -0.00000                             | 0.18192                          |
|                                   | I            | 1a           | 0.66916                          | -0.00000                             | 0.37803                          |

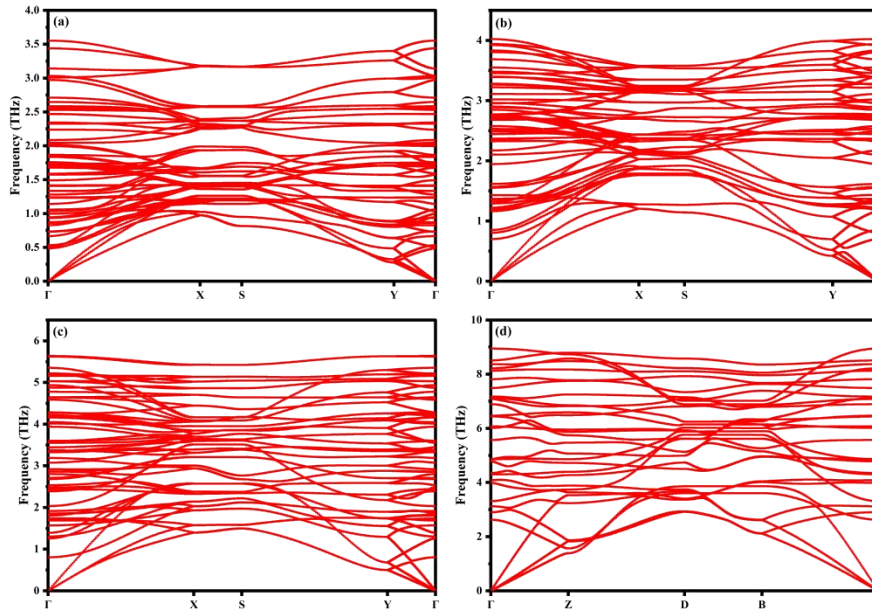

FIG. S1: Phonon spectrum of  $\text{RbPbI}_3$  (a)  $\text{ppPv-}Pnma$  (0 GPa), (b)  $\text{ppPv-}Pnma(I)$  (5 GPa), (c)  $\text{ppPv-}Pnma(V)$  (20 GPa), (d)  $Pm$  (80 GPa), respectively.

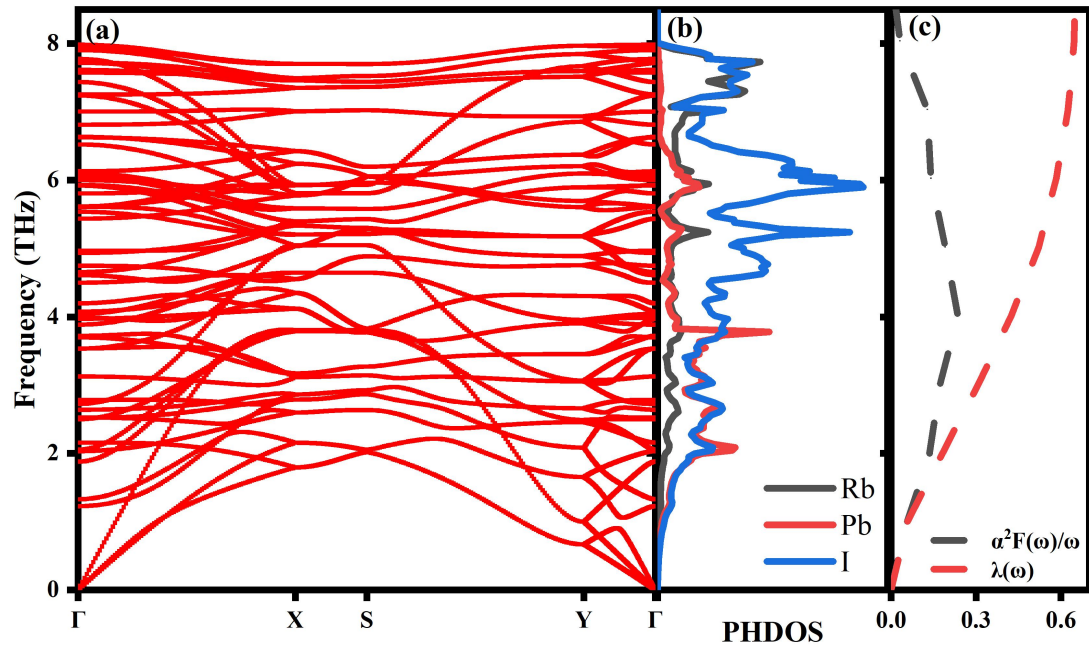

Fig. S2: Spectral function and electron-phonon coupling integral of the ppPv-Pnma(V) phase of RbPbI<sub>3</sub> at 60 GPa.
